# Supplementary material for: Neighborhood Recreation Facilities and Facility Membership Are Jointly Associated with Objectively Measured Physical Activity
Source: Springer Nature journal article supplement (doi:10.1007/s11524-019-00357-1), 2019-04-29
Supplement: MOESM1 [file 16684750]

**Supplementary table 1.** Definitions for commercial physical activity facilities. We assigned businesses to the researcher-defined category using an SIC code that characterized the overall nature of the business and, where applicable, the most recently reported company name and trade name (for common name searches).

| **Business category** | **Definition** (for SAS 9.4) | **SIC description** |
| --- | --- | --- |
| **Commercial physical activity facilities** | *Includes 103 SIC codes.*  *Gyms located within community centers such as YMCAs are identified through a text search among the most recent company and tradename for 4 businesses.*  if SIC in (39490103, 70110201, 70110306, 70110307, 70320301, 79110000, 79110100, 79110101, 79110200, 79110201, 79110202, 79110203, 79110204, 79330000, 79339903, 79410104, 79410201, 79910000, 79910100, 79910101, 79910102, 79910300, 79910301, 79910302, 79920000, 79970000, 79970100, 79970101, 79970102, 79970200, 79970201, 79970202, 79970203, 79970204, 79970300, 79970301, 79970302, 79970402, 79970403, 79970500, 79970502, 79970503, 79970504, 79979904, 79979906, 79979908, 79990100, 79990101, 79990102, 79990200, 79990202, 79990203, 79990204, 79990205, 79990300, 79990301, 79990302, 79990303, 79990501, 79990600, 79990601, 79990602, 79990603, 79990700, 79990701, 79990702, 79990703, 79990704, 79990705, 79991102, 79991103, 79991104, 79991107, 79991109, 79991110, 79991111, 79991112, 79991113, 79991115, 79991116, 79991118, 79991119, 79991120, 79991121, 79991122, 79991123, 79991127, 79991200, 79991201, 79991202, 79991205, 79991400, 79991402, 79991409, 79991411, 79991412, 79991512, 79991601, 79991602, 79999903, 79999910, 82999903, 82999914) or  INDEX(COMPANYHERE,'JCC OF')>0 or  INDEX(COMPANYHERE,'JEWISH CMMN CTR')>0 or  INDEX(COMPANYHERE,'JEWISH CMMNTY CTR')>0 or  INDEX(COMPANYHERE,'JEWISH CMNTY CNTRE')>0 or  INDEX(COMPANYHERE,'JEWISH CMNTY CTR')>0 or  INDEX(COMPANYHERE,'JEWISH CMNTY HSE')>0 or  INDEX(COMPANYHERE,'JEWISH CMTY CENTER')>0 or  INDEX(COMPANYHERE,'JEWISH COMMNTY CTR')>0 or  INDEX(COMPANYHERE,'JEWISH COMMUNITY CENTER')>0 or  INDEX(COMPANYHERE,'JEWISH COMMUNITY CENTRE')>0 or  INDEX(COMPANYHERE,'JEWISH COMMUNITY CTR')>0 or  INDEX(COMPANYHERE,'JEWISH CMNTY CTR')>0 or  INDEX(COMPANYHERE,'JEWISH COMMUNTY CENTER')>0 or  INDEX(COMPANYHERE,'Y M & Y M H A')>0 or  INDEX(COMPANYHERE,'Y M C A')>0 or  INDEX(COMPANYHERE,'Y W C A')>0 or  INDEX(COMPANYHERE,'YM C A')>0 or  INDEX(COMPANYHERE,'YMHA')>0 or  INDEX(COMPANYHERE,'YWHA')>0 or  INDEX(COMPANYHERE,'YMCA')>0 or  INDEX(COMPANYHERE,'YMWCA')>0 or  INDEX(COMPANYHERE,'YWCA')>0 or  INDEX(COMPANYHERE,'YNG MENS & YNG WOMENS HEBREW')>0 or  INDEX(COMPANYHERE,'YOUNG MEN CHRISTIAN ASSOCIATON')>0 or  INDEX(COMPANYHERE,'YOUNG MEN YUNG WNS HBREW ASSN')>0 or  INDEX(COMPANYHERE,'YOUNG MEN YUNG WNS HEBREW ASSN')>0 or  INDEX(COMPANYHERE,'YOUNG MENS & WOMENS ASSC')>0 or  INDEX(COMPANYHERE,'YOUNG MENS & WOMENS CHRISTIA')>0 or  INDEX(COMPANYHERE,'YOUNG MENS & YOUNG WOMENS')>0 or  INDEX(COMPANYHERE,'YOUNG MENS AND YOUNG WOMENS')>0 or  INDEX(COMPANYHERE,'YOUNG MENS CHRISTIAN')>0 or  INDEX(COMPANYHERE,'YOUNG MENS CHRSTN ASSOC')>0 or  INDEX(COMPANYHERE,'YOUNG MENS HEBREW ASSOCIATION')>0 or  INDEX(COMPANYHERE,'YOUNG MENS YNG WMNS HBRW ASSN')>0 or  INDEX(COMPANYHERE,'YOUNG MENS/YOUNG WOMENS HEBREW')>0 or  INDEX(COMPANYHERE,'YOUNG MNS CHRISTN ASSN')>0 or  INDEX(COMPANYHERE,'YOUNG MNS CHRSTN ASSN')>0 or  INDEX(COMPANYHERE,'YOUNG MNS YUNG WNS HEBREW ASSN')>0 or  INDEX(COMPANYHERE,'YOUNG WNS CHRISTN ASSN')>0 or  INDEX(COMPANYHERE,'YOUNG WOMANS CHRISTIAN ASSOC')>0 or  INDEX(COMPANYHERE,'YOUNG WOMENS CHRISTIAN')>0 or  INDEX(COMPANYHERE,'YWC ASSOC')>0 or  index(TradeNameHERE,'J C C')>0 or  index(TradeNameHERE,'JCC')>0 or  index(TradeNameHERE,'JEWISH CMNTY CNTR')>0 or  index(TradeNameHERE,'JEWISH CMNTY CTR')>0 or  index(TradeNameHERE,'JEWISH COMMUNITY CENTER')>0 or  index(TradeNameHERE,'JEWISH COMMUNITY CNTR')>0 or  index(TradeNameHERE,'Y M C A')>0 or  index(TradeNameHERE,'Y W C A')>0 or  index(TradeNameHERE,'YM & YW H A')>0 or  index(TradeNameHERE,'YWHA')>0 or  index(TradeNameHERE,'YMCA')>0 or  index(TradeNameHERE,'YMWCA')>0 or  index(TradeNameHERE,'YOUNG MENS CHRISTIAN ASSOCIAT')>0 or  index(TradeNameHERE,'YOUNG MNS YUNG WNS HEBREW ASSN')>0 or  index(TradeNameHERE,'YOUNG WOMENS CHRISTIAN ASSN')>0 or  index(TradeNameHERE,'YOUNG WOMENS CHRISTIAN ASSOC')>0 or  index(TradeNameHERE,'YWCA')>0 | | 39490103 | | Driving ranges, golf, electronic | | | --- | --- | --- | --- | | 70110201 | | Ski lodge | | | 70110306 | | YMCA/YMHA hotel | | | 70110307 | | YWCA/YWHA hotel | | | 70320301 | | Fishing camp | | | 79110000 | | Dance studios, schools, and halls | | | 79110100 | | Dance hall services | | | 79110101 | | Dance hall or ballroom operation | | | 79110200 | | Dance instructor and school services | | | 79110201 | | Childrens' dancing school | | | 79110202 | | Dance instructor | | | 79110203 | | Dance studio and school | | | 79110204 | | Professional dancing school | | | 79330000 | | Bowling centers | | | 79339903 | | Ten pin center | | | 79410104 | Ice hockey club | | | 79410201 | Boxing and wrestling arena | | | 79910000 | | Physical fitness facilities | | | 79910100 | | Physical fitness clubs with training equipment | | | 79910101 | | Athletic club and gymnasiums, membership | | | 79910102 | | Health club | | | 79910300 | | Exercise facilities | | | 79910301 | Aerobic dance and exercise classes | | | 79910302 | | Exercise salon | | | 79920000 | | Public golf courses | | | 79970000 | | Membership sports and recreation clubs | | | 79970100 | Ice sports | | | 79970101 | | Curling club, membership | | | 79970102 | Hockey club, except professional and semi- professional | | | 79970200 | | Boating and swimming clubs | | | 79970201 | | Beach club, membership | | | 79970202 | | Boating club, membership | | | 79970203 | Swimming club, membership | | | 79970204 | | Yacht club, membership | | | 79970300 | | Gun and hunting clubs | | | 79970301 | | Gun club, membership | | | 79970302 | | Hunting club, membership | | | 79970402 | Football club, except professional and semi- professional | | | 79970403 | Polo club, membership | | | 79970500 | Indoor/outdoor court clubs | | | 79970502 | Racquetball club, membership | | | 79970503 | Squash club, membership | | | 79970504 | Tennis club, membership | | | 79979904 | | Country club, membership | | | 79979906 | | Golf club, membership | | | 79979908 | | Riding club, membership | | | 79990100 | Tennis services and professionals | | | 79990101 | Tennis club, non-membership | | | 79990102 | Tennis courts, outdoor/indoor: non-membership | | | 79990200 | | Golf services and professionals | | | 79990202 | | Golf driving range | | | 79990203 | | Golf professionals | | | 79990204 | | Golf, pitch-n-putt | | | 79990205 | | Miniature golf course operation | | | 79990300 | Indoor court clubs | | | 79990301 | Handball courts, non-membership | | | 79990302 | Racquetball club, non-membership | | | 79990303 | Squash club, non-membership | | | 79990501 | Bicycle rental | | | 79990600 | Skating rink operation services | | | 79990601 | | Curling rinks | | | 79990602 | Ice skating rink operation | | | 79990603 | Roller skating rink operation | | | 79990700 | | Shooting facilities and archery lanes | | | 79990701 | | Archery lanes | | | 79990702 | | Shooting gallery | | | 79990703 | | Shooting range operation | | | 79990704 | | Skeet shooting facility | | | 79990705 | | Trapshooting facility, non-membership | | | 79991102 | | Baseball instruction school | | | 79991103 | Basketball instruction school | | | 79991104 | | Bowling instruction | | | 79991107 | Diving instruction, underwater | | | 79991109 | | Gymnastic instruction, non-membership | | | 79991110 | Hockey instruction school | | | 79991111 | Judo instruction | | | 79991112 | Karate instruction | | | 79991113 | Martial arts school, nec | | | 79991115 | | Sailing instruction | | | 79991116 | Scuba and skin diving instruction | | | 79991118 | Skating instruction, ice or roller | | | 79991119 | Ski instruction | | | 79991120 | Sports instruction, schools and camps | | | 79991121 | | Surfing instruction | | | 79991122 | Swimming instruction | | | 79991123 | | Yoga instruction | | | 79991127 | | Physical fitness instruction | | | 79991200 | | Riding and rodeo services | | | 79991201 | | Riding academy and school | | | 79991202 | | Riding stable | | | 79991205 | | Saddlehorse rental | | | 79991400 | | Beach and water sports equipment rental and services | | | 79991402 | | Bathing beach, non-membership | | | 79991409 | | Rowboat and canoe rental | | | 79991411 | | Surfing equipment rental | | | 79991412 | Swimming pool, non-membership | | | 79991512 | | Waterslide operation | | | 79991601 | | Hunting guides | | | 79991602 | | Rafting tours | | | 79999903 | | Baseball batting cage | | | 79999910 | | Recreation center | | | 82999903 | Baton instruction | | | 82999914 | Self-defense and athletic instruction | | |
